# Supplementary material for: A Survey for Examining the Effects of COVID-19 and Infection Control Measures in Older Persons With Mild Cognitive Impairment and Dementia and Their Caregivers
Source: PubMed Central journal article supplement (PMC7701287; doi:10.3389/fpsyt.2020.599851), 2020-11-16
Supplement: Data_Sheet_1.pdf [file Data_Sheet_1.pdf]

**Appendix 1.** The Effect of the COVID-19 Lockdown on Persons with Neurocognitive Disorders – Patient version

Identification code: \_\_\_\_\_

Date: \_\_\_/\_\_\_/\_\_\_

**THE EFFECT OF THE COVID-19 LOCKDOWN ON PERSONS WITH NEUROCOGNITIVE DISORDERS  
PATIENT VERSION**

The purpose of this survey is to obtain information about your experience of the lockdown that has occurred because of the coronavirus pandemic. The questions are not designed to check up on you to see if you are following any rules - none of the information you provide will be given to anyone else. The questionnaire is completely anonymous and subject to the European and National privacy regulations (UE 2016/679). Your data will be used exclusively for statistical and research purposes, i.e. scientific publications.

**Section 1. General information**

**1. Year of birth** \_\_\_\_\_

**2. Gender**

Female       Male

**3. Where do you live?** \_\_\_\_\_ (please insert the town/city)

**4. Education level (years):** \_\_\_\_\_

**5. Do you live alone?**

Yes       No

**5.a. If not, who lives with you?**

Spouse       Grandchild  
 Daughter       Other: \_\_\_\_\_  
 Son

**5.b. If you live alone, do you have a family member who lives in the same building or within walking distance?**

Yes       No

**5.c. Who do you consider to be the person who provides the main informal source of care and support for you in relation to your diagnosis?**

Spouse       Grandchild  
 Daughter       Other: \_\_\_\_\_  
 Son

**6. Do you have any outside space in your home?**

Balcony       Communal garden or yard shared with neighbours  
 Garden       Other: \_\_\_\_\_  
 Patio

**7. Are you currently a smoker?**

Yes       No

**7.a. If yes, how many cigarettes per day?** \_\_\_\_\_

**8. Which type of devices do you have in your home? (Tick all that apply)**

- Smartphone
- Mobile Phone /Landline phone
- PC/computer
- Television
- Amazon devices (i.e. Alexa)
- Tablet

**Section 2. Individual protection methods**

Please answer the following questions in relation to when the coronavirus outbreak started:

**9. Have you bought a surgical mask or has someone given you one?**

- Yes
- No

**9.a If not, why?**

- They sold out in my town/city
- I don't think I need one
- They are too expensive
- Other: \_\_\_\_\_

**10. Have you bought (or has someone bought for you) disposable gloves?**

- Yes
- No

**10.a If not, why?**

- They sold out in my town/city
- I prefer to wash my hands
- I use a disinfectant gel
- Other: \_\_\_\_\_

**11. Do you know how long you should wash hands for them to be properly clean according to medical guidelines?**

\_\_\_\_\_ seconds                      Other: \_\_\_\_\_

**11.b. Have you been washing your hands more often than before?**

- Yes
- No
- Maybe

**Section 3. Knowledge about COVID-19**

|    |                                                                                                                                                                     | Never | Rarely | Sometimes | Usually | Always |
|----|---------------------------------------------------------------------------------------------------------------------------------------------------------------------|-------|--------|-----------|---------|--------|
| 12 | I'm trying to keep up to date with the latest information on coronavirus by watching TV, talk shows, reading magazines or searching for information on the internet |       |        |           |         |        |
| 13 | I'm aware of the decisions and rules made by the Government                                                                                                         |       |        |           |         |        |
| 14 | I'm aware of the risks of coronavirus                                                                                                                               |       |        |           |         |        |
| 15 | I'm aware of how the outbreak is spreading in different countries                                                                                                   |       |        |           |         |        |
| 16 | I'm trying to maintain social distancing and staying inside                                                                                                         |       |        |           |         |        |

**NOTE TO THE RESEARCHER: make sure you repeat the options to the patient for every question.**

**Section 4. How COVID-19 is affecting your life**

**17. Do you think that you contracted the coronavirus?**

- Yes                       No

**17.a. If yes, did you contact your GP?**

- Yes                       No

**17.b. Were you tested for the virus?**

- Yes                       No

**17.c. Which symptoms did you have?** \_\_\_\_\_

\_\_\_\_\_

**17.d. Other details:** \_\_\_\_\_

\_\_\_\_\_

**18. Has anyone you know contracted the coronavirus?**

- Yes                       No

If yes, who: \_\_\_\_\_

**19. Has anyone you know died because of contracting the coronavirus?**

- Yes                       No

If yes, who: \_\_\_\_\_

**20. Due to the coronavirus, are you afraid to go out?**

- Yes, more than before                       No more than usual  
 Slightly more than before                       I was always afraid of going out

**21. How many times a week do you:**

- Receive visits in your home from family or friends or caregivers: \_\_\_\_\_  
 Go to the shops: \_\_\_\_\_  
 Leave your property for a walk/run/bike ride: \_\_\_\_\_  
 Drive your car: \_\_\_\_\_  
 Go to the doctor/hospital/have a blood test: \_\_\_\_\_  
 Go to the pharmacy: \_\_\_\_\_  
 Buy a paper from the newsagent: \_\_\_\_\_  
 Buy cigarettes from the shop: \_\_\_\_\_  
 I never go out

**22. How often, on average, do you go outside each day (garden, balcony, patio, out of the house etc.)?**

- Less than 3 hours                       More than 3 hours                       Other: \_\_\_\_\_

**23. Have any of your routine medical visits been cancelled because of the coronavirus lockdown?**

- Yes                       No, I didn't have any booked                       No, they were not cancelled

If yes, please indicate which ones: \_\_\_\_\_

**23.a. If yes, are you worried about it?**

- Yes                       No

**If yes, why?** \_\_\_\_\_

**23.b. Are you taking any medications prescribed by a doctor?**

- Yes                       No

**23.c. Have you had difficulties finding prescription medicines?**

- Yes                       No

**23.d. If yes, please tick all that apply:**

- Difficulty obtaining a prescription from the doctor  
 The drugs are not available in the pharmacy  
 I need to wait for the pharmacy to order the drugs  
 I am avoiding going into the pharmacy because of the risk of coronavirus  
 Other: \_\_\_\_\_

**23.e. Have you forgotten to take your medication during the lockdown period?**

- Never                       Rarely                       Sometimes                       Often                       Always

**23.f. Has this worsened since the lockdown began?**

- Yes                       No                       Maybe

**23.g. Have you been able to contact your GP during the lockdown?**

- |                                                  |                                                          |
|--------------------------------------------------|----------------------------------------------------------|
| <input type="checkbox"/> Yes, by phone           | <input type="checkbox"/> Yes, I went to the surgery      |
| <input type="checkbox"/> Yes, through video call | <input type="checkbox"/> No, I have no medical concern   |
| <input type="checkbox"/> Yes, by text message    | <input type="checkbox"/> No, I don't want to bother them |

**23.h. Do you need specialist care for an ongoing chronic condition?**

- Yes                       No

**If yes, please specify:** \_\_\_\_\_

**23.i. Have you been for any medical check-ups at the hospital/clinic/GP surgery since the start of the pandemic?**

- Yes                       No

**If yes, please specify:** \_\_\_\_\_

**23.j. Are you concerned about any aspects of your health?**

- Yes                       No

**If yes, please specify:** \_\_\_\_\_

**24. Did you have a formal or informal caregiver or family member who helped you perform any activities before the lockdown?**

- Yes                       I need one but didn't have one                       No, I do not need one, I am independent

**24.a If yes, list the type of care that you received before the pandemic and during the lockdown:**

|                           | BEFORE PANDEMIC | DURING PANDEMIC/LOCKDOWN |
|---------------------------|-----------------|--------------------------|
| Going to the toilet       | YES/NO          | YES/NO                   |
| Eating                    | YES/NO          | YES/NO                   |
| Dressing                  | YES/NO          | YES/NO                   |
| Personal hygiene          | YES/NO          | YES/NO                   |
| Walking                   | YES/NO          | YES/NO                   |
| Bathing                   | YES/NO          | YES/NO                   |
| Making phone calls        | YES/NO          | YES/NO                   |
| Grocery shopping          | YES/NO          | YES/NO                   |
| Cooking meals             | YES/NO          | YES/NO                   |
| Cleaning house            | YES/NO          | YES/NO                   |
| Doing the laundry         | YES/NO          | YES/NO                   |
| Driving                   | YES/NO          | YES/NO                   |
| Taking medications        | YES/NO          | YES/NO                   |
| Help with financial tasks | YES/NO          | YES/NO                   |

**25. Have your caregivers come to your home to see you during the lockdown?**

- They never come
- The same as before
- More often
- Less often
- Not applicable, I live with them

**26. How do you keep in contact with friends and family members during the lockdown?**

- Phone calls
- They have visited me
- Video calls
- I have visited them
- Instant messages

**26.a. Has there been any change in your frequency of communication with family and friends since the coronavirus pandemic started?**

- More than usual
- Less than usual
- Unchanged

**27. Have your shopping habits changed since the coronavirus pandemic started?**

- I buy only what I really need
- I buy anything I feel like, whether I need it or not
- I buy two or more packs of the same product
- I buy less than before

**28. Has your attitude to food changed since the coronavirus pandemic started?**

- I eat more healthier than before
- I eat more unhealthy foods now
- I snack a lot during the day
- I eat less than before

**29. If you're a smoker, has your smoking increased during the lockdown?**

- Yes
- No

**29.a. If yes, how many more cigarettes/day compared to before: \_\_\_\_\_**

**30. Do you think that your weight has changed since the pandemic began?**

- Weight is the same
- Lost weight
- Gained weight

**31. What kind of physical activity have you been doing during the pandemic?**

- Walking outside
- Walking at home
- None
- Cycling outside
- Exercises at home
- Other \_\_\_\_\_

**31.a. How often have you been doing physical exercise during the pandemic?**

\_\_\_\_\_ minutes per day  
 \_\_\_\_\_ times per week

**Section 5. The effect of COVID-19 on emotional state**

Please indicate the response the best describes how you feel at the moment, since the pandemic started

|    |                                                                                      | Never | Rarely | Sometimes | Usually | Always |
|----|--------------------------------------------------------------------------------------|-------|--------|-----------|---------|--------|
| 1  | I'm unhappy doing so many things alone                                               |       |        |           |         |        |
| 2  | I lack companionship                                                                 |       |        |           |         |        |
| 3  | I find myself waiting for people to call or write more than before                   |       |        |           |         |        |
| 4  | Some days I spend most of the day in bed                                             |       |        |           |         |        |
| 5  | I would love to hug someone                                                          |       |        |           |         |        |
| 6  | The days seem to last too long                                                       |       |        |           |         |        |
| 7  | People are around me but not with me                                                 |       |        |           |         |        |
| 8  | I think that if something happens to me I won't have anyone who can help me          |       |        |           |         |        |
| 9  | I wish my family members would do more for me                                        |       |        |           |         |        |
| 10 | I have the feeling that there is someone in my house                                 |       |        |           |         |        |
| 11 | I feel angry                                                                         |       |        |           |         |        |
| 12 | I feel less motivated to do things                                                   |       |        |           |         |        |
| 13 | I feel anxious                                                                       |       |        |           |         |        |
| 14 | I feel sad                                                                           |       |        |           |         |        |
| 15 | I worry that other people are not following social distancing measures               |       |        |           |         |        |
| 16 | I am worried about catching the coronavirus                                          |       |        |           |         |        |
| 17 | I am worried about getting into trouble for not following social distancing rules    |       |        |           |         |        |
| 18 | I am worried about my economic situation                                             |       |        |           |         |        |
| 19 | I have problems sleeping                                                             |       |        |           |         |        |
| 20 | I treat myself with food or alcohol                                                  |       |        |           |         |        |
| 21 | When the pandemic ends, I am afraid that I won't be able to resume my life as it was |       |        |           |         |        |
| 22 | I'm trying to see the positive side of things, but it's difficult                    |       |        |           |         |        |
| 23 | I don't think I can hold out much longer in this situation                           |       |        |           |         |        |

**Thank you!**

**Appendix 2.** The Effect of the COVID-19 Lockdown on Persons with Neurocognitive Disorders — Informant and Caregiver version

Identification code: \_\_\_\_\_

Date: \_\_\_ / \_\_\_ / \_\_\_\_\_

**THE EFFECT OF COVID-19 LOCKDOWN ON PERSONS WITH NEUROCOGNITIVE DISORDERS  
INFORMANT AND CAREGIVER VERSION**

The purpose of this survey is to obtain information about your experience of the lockdown that has occurred because of the coronavirus pandemic. The questions are not designed to check up on you to see if you are following any rules - none of the information you provide will be given to anyone else. The questionnaire is completely anonymous and subject to the European and National privacy regulations (UE 2016/679). Your data will be used exclusively for statistical and research purposes, i.e. scientific publications.

**NOTE TO THE RESEARCHER:** This questionnaire should be administered to the person whom the patient identifies as being the main informal source of care and support in relation to their diagnosis (this can be a spouse, child, relative, friend or privately-hired support person who either lives or does not live with the patient. Please use the patient's name throughout the survey, in place of "*the patient*").

**Section 1. General information**

1. Year of birth \_\_\_\_\_

2. Gender

Female       Male

3. Where do you live? \_\_\_\_\_ (please insert the town/city)

4. Education level (years): \_\_\_\_\_

5. What relation are you to *the patient*?

Spouse       Grandchild  
 Daughter       Other: \_\_\_\_\_  
 Son

5.b. Do you consider yourself to be the person who provides the main informal source of care and support to *the patient* in relation to their diagnosis?

Yes       No

6. Do you live with *the patient*?

Yes       No

6.a. If not, do you live in the same building or nearby?

Yes       No

6.b. Are you able to see him/her regularly?

Yes       No

7. Are you currently a smoker?

Yes       No

7.a. If yes, how many cigarettes per day? \_\_\_\_\_

**8. What devices do you have in your home? (Tick all that apply)**

- Smartphone
- Mobile Phone /Landline phone
- PC/computer
- Television
- Amazon devices (i.e. Alexa)
- Tablet

**8.a. Which type are in *the patient's* home? (Tick all that apply)**

- Smartphone
- Mobile Phone /Landline phone
- PC/computer
- Television
- Amazon devices (i.e. Alexa)
- Tablet

**8.b. During the lockdown, what type of devices have you used to communicate with *the patient*?**

- Phone call
- Video call
- Messages
- Other: \_\_\_\_\_

**Section 2. Individual protection methods**

Please answer the following questions in relation to when the coronavirus outbreak started

**9. Have you bought a surgical mask for yourself and/or *the patient*?**

- Yes
- No

**9.a If not, why?**

- They sold out in my town/city
- I don't think I need one
- They are too expensive
- Other: \_\_\_\_\_

**10. Have you bought disposable gloves for yourself and/or *the patient*?**

- Yes
- No

**10.a If not, why?**

- They sold out in my town/city
- I prefer to wash my hands
- I use disinfectant gel
- Other: \_\_\_\_\_

**11. Are you making sure that *the patient* washes their hands more than before?**

- Yes
- No
- Maybe

**11.a. Is it difficult to make him/her wash their hands?**

- No
- He/she often forgets
- He/she washes them several times because they forget that they have already washed them
- Other: \_\_\_\_\_



### Section 3. Knowledge about COVID-19

|    |                                                                                                                                                             | Never | Rarely | Sometimes | Usually | Always |
|----|-------------------------------------------------------------------------------------------------------------------------------------------------------------|-------|--------|-----------|---------|--------|
| 12 | I'm trying to keep up to date with information about coronavirus by watching TV, talk shows, reading magazines or searching for information on the internet |       |        |           |         |        |
| 13 | I'm aware of the decisions and rules made by the Government                                                                                                 |       |        |           |         |        |
| 14 | I'm aware of the risks of coronavirus                                                                                                                       |       |        |           |         |        |
| 15 | I'm aware of how the outbreak is spreading in different countries                                                                                           |       |        |           |         |        |
| 16 | I make sure that the patient is aware of the situation                                                                                                      |       |        |           |         |        |
| 17 | I'm following the Government's rules and recommendations about social distancing and staying inside                                                         |       |        |           |         |        |
| 18 | I make sure that the patient follows the rules and recommendations                                                                                          |       |        |           |         |        |

**NOTE TO THE RESEARCHER: make sure you repeat the options for every question**

### Section 4. How coronavirus is affecting your life

19. Do you think that you have contracted the coronavirus?  Yes  No

19.a. If yes, did you contact your GP?  Yes  No

19.b. Were you tested for the virus?  Yes  No

19.c. Which symptoms did you have? \_\_\_\_\_  
\_\_\_\_\_

19.d. Other details: \_\_\_\_\_  
\_\_\_\_\_

20. Has anyone you know contracted the coronavirus?

Yes  No

If yes, who: \_\_\_\_\_

21. Has anyone you know died because of contracting the coronavirus?

Yes  No

If yes, who: \_\_\_\_\_

22. Due to the coronavirus pandemic, have you lost your job?

Yes  No

22.a. If not, has your company initiated any special working conditions?

Home-based working  Other: \_\_\_\_\_

23. Due to the coronavirus, are you afraid to go out?

Yes, more than before  No more than usual  
 Slightly more than before  I was already afraid of going out

**23.a. Are you afraid to visit *the patient* because of the coronavirus?**

- Yes             No             Not applicable

**24. Have any of *the patient's* routine medical visits been cancelled because of the coronavirus pandemic and lockdown?**

- Yes             No

**If yes, please indicate which ones:** \_\_\_\_\_

**24.a. If yes, are you worried about it?**

- Yes             No

**If yes, why?** \_\_\_\_\_

**25. Does *the patient* take drugs prescribed by a doctor?**

- Yes             No

**25.a. If yes, does *the patient* take a drug for dementia?**

- Yes             No

**25.b. Have you experienced difficulties finding prescription medicines?**

- Yes             No

**25.c. If yes, please tick all that apply:**

- Difficulty obtaining a medical prescription from the doctor  
 The drugs are not available in the pharmacy  
 We need to wait for the pharmacy to order the drugs  
 We avoid going into the pharmacy because of the risk of coronavirus  
 Other: \_\_\_\_\_

**25.d. During the pandemic, how have you been monitoring *the patient's* medication intake?**

- Phone calls                             Messages  
 I give them directly                 Not applicable, they manage their drugs independently

**25.e. Since the pandemic, does *the patient* ever forget to take their medicine?**

- Never             Rarely             Sometimes             Usually             Always

**25.f. Has this gotten worse since before the pandemic started?**

- Yes             No             Maybe

**25.g. Have you been able to contact your GP since the pandemic began?**

- Yes, by phone  
 Yes, through video call  
 Yes, by text message  
 Yes, I went to the surgery  
 No, I have no medical concern  
 No, I don't want to bother them

**25.h. Do you or *the patient* need specialist medical care for an ongoing chronic condition?**

- Yes                       No

**If yes, specify:** \_\_\_\_\_

**25.i. Since the lockdown began, have you attended medical check-ups at the hospital/clinic/GP surgery?**

- Yes                       No

**If yes, please specify:** \_\_\_\_\_

**25.j. Are you concerned about any aspects of *the patient's* health?**

- Yes                       No

**If yes, please specify:** \_\_\_\_\_

**26. Before the pandemic did you help *the patient* with any of their activities of daily living?**

- Yes                       No                       Not applicable, they are completely independent

**26.a If yes, list the type of care that they received (from you or another informal caregiver) before the pandemic and during the lockdown:**

|                           | BEFORE PANDEMIC | DURING PANDEMIC/LOCKDOWN |
|---------------------------|-----------------|--------------------------|
| Going to the toilet       | YES/NO          | YES/NO                   |
| Eating                    | YES/NO          | YES/NO                   |
| Dressing                  | YES/NO          | YES/NO                   |
| Personal hygiene          | YES/NO          | YES/NO                   |
| Walking                   | YES/NO          | YES/NO                   |
| Bathing                   | YES/NO          | YES/NO                   |
| Making phone calls        | YES/NO          | YES/NO                   |
| Grocery shopping          | YES/NO          | YES/NO                   |
| Cooking meals             | YES/NO          | YES/NO                   |
| Cleaning the house        | YES/NO          | YES/NO                   |
| Doing the laundry         | YES/NO          | YES/NO                   |
| Driving                   | YES/NO          | YES/NO                   |
| Taking medication         | YES/NO          | YES/NO                   |
| Help with financial tasks | YES/NO          | YES/NO                   |

**27. During the coronavirus pandemic, have you visited *the patient*?**

- Never                                               Less often  
 The same as before                               Not applicable, I live with him/her  
 More often

**28. During the coronavirus pandemic, how do you keep in contact with *the patient*?**

- Phone call                       Video call                       Instant messages  
 I've visited him/her                       He/she has visited me

**28.a. During the coronavirus pandemic, how frequently have you been communicating with family and friends?**

- More than usual                       Less than usual                       Unchanged

**29. Have your shopping habits changed since the coronavirus pandemic started?**

- I buy only what I really need
- I buy anything I want, whether I need it or not
- I buy two or more packs of the same product
- I buy less than before

**30. Has your attitude to food changed since the coronavirus pandemic began?**

- I eat more healthier than before
- I eat more unhealthy foods now
- I snack a lot during the day
- I eat less than before

**31. If you're a smoker, have you been smoking more during lockdown than before the pandemic?**

- Yes
- No

**31.a. If yes, how many more cigarettes/day compared to before? \_\_\_\_\_**

**32. Do you think your weight has changed since the lockdown started?**

- Weight is the same
- Lost weight
- Gained weight

**33. What physical activity have you been doing during the pandemic?**

- Walking outside
- Cycling outside
- Exercises at home
- Walking at home
- None
- Other \_\_\_\_\_

**33.a. How often do you exercise during the lockdown?**

\_\_\_\_\_ minutes per day

\_\_\_\_\_ times per week

## Section 5. The effect of COVID-19 on emotional state

Please indicate the response the best describe how you feel at the moment, since the pandemic started:

|    |                                                                                                                                        | Never | Rarely | Sometimes | Usually | Always |
|----|----------------------------------------------------------------------------------------------------------------------------------------|-------|--------|-----------|---------|--------|
| 1  | <b>The patient</b> asks for more help than he/she needs                                                                                |       |        |           |         |        |
| 2  | I'm tired of worrying about whether <b>the patient</b> is safe and following social distancing and hand-washing guidelines             |       |        |           |         |        |
| 3  | If something happens to <b>the patient</b> I don't know how to help him/her                                                            |       |        |           |         |        |
| 4  | I'm afraid that the patient will tell me that everything is fine, but he/she isn't telling the truth                                   |       |        |           |         |        |
| 5  | <b>The patient</b> has told me that I have been abandoning them                                                                        |       |        |           |         |        |
| 6  | <b>The patient</b> doesn't appreciate the effort I make to take care of him/her despite the pandemic                                   |       |        |           |         |        |
| 7  | When <b>the patient</b> doesn't answer the phone, I think something has happened to him/her                                            |       |        |           |         |        |
| 8  | In some ways, we have had a better relationship since the pandemic began                                                               |       |        |           |         |        |
| 9  | I feel I could do a better job in caring for <b>the patient</b>                                                                        |       |        |           |         |        |
| 10 | When the pandemic ends, I am afraid that the patient will not be able to resume <b>his/her</b> life in the same way that it was before |       |        |           |         |        |
| 11 | I feel angry                                                                                                                           |       |        |           |         |        |
| 12 | I feel burdened                                                                                                                        |       |        |           |         |        |
| 13 | I feel anxious                                                                                                                         |       |        |           |         |        |
| 14 | I feel sad                                                                                                                             |       |        |           |         |        |
| 15 | I worry that other people are not following hygiene and social distancing measures                                                     |       |        |           |         |        |
| 16 | I am worried about catching the coronavirus                                                                                            |       |        |           |         |        |
| 17 | I am worried about getting into trouble for not following hygiene and social distancing measures                                       |       |        |           |         |        |
| 18 | I feel worried about my economic situation                                                                                             |       |        |           |         |        |
| 19 | I have problems sleeping                                                                                                               |       |        |           |         |        |
| 20 | I treat myself to food and alcohol                                                                                                     |       |        |           |         |        |
| 21 | When the pandemic ends, I am afraid that I will not be able to resume my life as it was before                                         |       |        |           |         |        |
| 22 | I'm trying to see the positive side of things, but it's difficult                                                                      |       |        |           |         |        |
| 23 | I don't think I can hold out much longer in this situation                                                                             |       |        |           |         |        |

**Thank you!**

**Appendix 3.** The Effect of the COVID-19 Lockdown on Persons with Neurocognitive Disorders – Italian Patient version

Codice paziente: \_\_\_\_\_

Data: \_\_\_ / \_\_\_ / \_\_\_

**GLI EFFETTI DELLA QUARANTENA SULLE PERSONE CON DISTURBI NEUROCOGNITIVI  
VERSIONE PAZIENTE**

Lo scopo di questo sondaggio è ottenere informazioni sulla Sua esperienza personale durante l'isolamento a causa della pandemia di coronavirus. Con questo sondaggio non vogliamo verificare se sta rispettando le regole, nessuna di queste informazioni verrà diffusa. Il questionario è completamente anonimo e soggetto alle normative sulla privacy europee e nazionali (UE 2016/679). I Suoi dati verranno utilizzati esclusivamente per finalità ricerca ed analisi statistiche, ad esempio pubblicazioni scientifiche.

**Sezione 1. Informazioni generali**

**1. Anno di nascita** \_\_\_\_\_

**2. Genere**

Donna           Uomo

**3. Dove vive?** \_\_\_\_\_ (Inserire la città/paese)

**4. Scolarità (in anni):** \_\_\_\_\_

**5. Vive da solo?**     Sì                       No

**5.a. Se no, con chi vive?**

Coniuge                                               Nipote

Figlio                                                 Figlia

Altro: \_\_\_\_\_

**5.b. Se vive da solo, ha un membro della Sua famiglia che vive con lei nello stesso edificio o a poca distanza?**

Sì                       No

**5.c. Chi è secondo lei la persona che le fornisce le maggiori cure e supporto di cui ha bisogno in relazione alla sua diagnosi?**

Coniuge                                               Nipote

Figlio                                                 Figlia

Altro: \_\_\_\_\_

**6. Ha uno spazio esterno alla sua casa?**

Balcone                                               Giardino comunale o condominiale

Giardino                                               Altro: \_\_\_\_\_

Terrazza

**7. E' attualmente un fumatore?**

Sì                       No

**7.a. Se sì, quante sigarette al giorno:** \_\_\_\_\_

**8. Quali dispositivi ha a casa sua? (Indicare tutte le risposte valide)**

- Smartphone
- Telefono cellulare/telefono fisso
- PC/computer
- Televisione
- Amazon devices (i.e. Alexa)
- Tablet

**Sezione 2. Dispositivi di protezione individuale**

Per favore risponda alle seguenti domande in riferimento al periodo di inizio dell'epidemia di coronavirus:

**9. Ha comprato, o qualcuno lo ha fatto per lei, una mascherina?**

- Sì
- No

**9.a. Se no, perché?**

- Sono introvabili nella mia città
- Non penso di averne bisogno
- Sono molto costose
- Altro: \_\_\_\_\_

**10. Ha comprato, o qualcuno lo ha fatto per lei, dei guanti usa e getta?**

- Sì
- No

**10.a. Se no, perché?**

- Sono introvabili nella mia città
- Preferisco lavarmi le mani più spesso
- Ho un gel disinfettante
- Altro: \_\_\_\_\_

**11. Sa per quanto tempo ci si dovrebbe lavare le mani per farlo correttamente in accordo con le linee guida mediche?**

\_\_\_\_\_ secondi                      Altro \_\_\_\_\_

**11.b. Si lava le mani molto più spesso di prima?**

- Sì
- No
- Forse

**Sezione 3. Conoscenza del Covid-19**

|    |                                                                                                                           | Mai | Raramente | Qualche volta | Spesso | Sempre |
|----|---------------------------------------------------------------------------------------------------------------------------|-----|-----------|---------------|--------|--------|
| 12 | Cerco di tenermi aggiornato seguendo telegiornali, seguendo talk show, leggendo riviste, acquistando libri sull'argomento |     |           |               |        |        |
| 13 | Sono a conoscenza delle normative emanate dal mio Governo                                                                 |     |           |               |        |        |
| 14 | Conosco i rischi di contrarre il coronavirus                                                                              |     |           |               |        |        |
| 15 | Sono a conoscenza della situazione epidemiologica negli altri Paesi del mondo                                             |     |           |               |        |        |
| 16 | Cerco di mantenere la distanza sociale e rimanere a casa                                                                  |     |           |               |        |        |

**NOTA PER IL RICERCATORE: assicurarsi di ripetere le opzioni di risposta per ogni domanda.**

#### Sezione 4. L'impatto del COVID-19 sulla vita quotidiana

##### 17. Pensa di aver contratto il coronavirus?

- Sì  No

##### 17.a. Se sì, ha contattato il medico di base?

- Sì  No

##### 17.b. Si è sottoposto al tampone?

- Sì  No

17.c. Quali sintomi ha avuto? \_\_\_\_\_

\_\_\_\_\_

17.d. Altri dettagli: \_\_\_\_\_

\_\_\_\_\_

##### 18. Qualcuno che conosce ha contratto il coronavirus?

- Sì  No

Se sì, chi? \_\_\_\_\_

##### 19. Qualcuno che conosce è morto di coronavirus?

- Sì  No

Se sì, chi? \_\_\_\_\_

##### 20. A causa del coronavirus, ha paura di uscire?

- Sì, molto più di prima  Non più del solito  
 Leggermente più di prima  Ho sempre paura di uscire

##### 21. Quante volte alla settimana:

- Ricevo visite dei familiari o degli amici o del badante: \_\_\_\_\_  
 Fare compere: \_\_\_\_\_  
 Uscire per una passeggiata/corsa/bicicletta: \_\_\_\_\_  
 Guidare la propria auto: \_\_\_\_\_  
 Andare dal dottore/ospedale/centro analisi: \_\_\_\_\_  
 Andare in farmacia: \_\_\_\_\_  
 Comprare un giornale: \_\_\_\_\_  
 Acquistare le sigarette: \_\_\_\_\_  
 Non sono mai uscito di casa

##### 22. Quanto spesso, in media, è uscito di casa ogni giorno (giardino, balcone, terrazzo o fuori casa)?

- Meno di 3 ore  3/+ ore  Altro \_\_\_\_\_

##### 23. A causa delle misure restrittive, sono state cancellate alcune delle sue visite mediche di routine?

- Sì  No, non sono state cancellate  Non ne avevo in programma

Se sì, per favore indicare quali: \_\_\_\_\_



**23.a. Se sì, è preoccupato per questo?**

- Sì  No

Se sì, perché? \_\_\_\_\_

**23.b. Sta assumendo una terapia prescritta da un dottore?**

- Sì  No

**23.c. Ha avuto difficoltà nel reperimento dei farmaci prescritti?**

- Sì  No

**23.d. Se sì, inserire tutte le alternative possibili:**

- Difficoltà ad ottenere ricette mediche/rinnovo piano terapeutico  
 Le medicine non erano disponibili in farmacia  
 Ho dovuto aspettare l'ordine in farmacia  
 Ho evitato di andare in farmacia per evitare le occasioni di contagio  
 Altro: \_\_\_\_\_

**23.e. In questo periodo, si è dimenticato di assumere le sue medicine?**

- Mai  Raramente  Qualche volta  Spesso  Sempre

**23.f. Questo aspetto è peggiorato rispetto a prima dell'inizio dell'isolamento?**

- Sì  No  Forse

**23.g. Durante l'isolamento, è riuscito a contattare il suo medico di base?**

- Sì, telefonicamente  Sì, sono andata presso lo studio  
 Sì, videochiamata  No, non ho avuto problemi di salute  
 Sì, messaggi  No, ho preferito non disturbarlo

**23.h. Ha avuto bisogno di cure specialistiche per una condizione cronica in corso?**

- Sì  No

Se sì, specificare: \_\_\_\_\_

**23.i. Durante l'isolamento, ha partecipato a controlli medici presso l'ospedale / clinica / studio medico:**

- Sì  No

Se sì, specificare: \_\_\_\_\_

**23.j. E' preoccupato per qualche aspetto della sua salute?**

- Sì  No

Se sì, quale e perché \_\_\_\_\_

**24. Prima dell'isolamento, aveva un familiare o un assistente formale/informale che l'aiutava nello svolgimento delle sue attività?**

- Sì  No  N/A autonomo

**24. a. Se sì, indicare quale tipo di aiuto ha ricevuto prima e durante il periodo di isolamento:**

|                      | PRIMA LOCKDOWN | DURANTE LOCKDOWN |
|----------------------|----------------|------------------|
| Andare in bagno      | SI/NO          | SI/NO            |
| Alimentazione        | SI/NO          | SI/NO            |
| Vestirsi             | SI/NO          | SI/NO            |
| Cura personale       | SI/NO          | SI/NO            |
| Camminare            | SI/NO          | SI/NO            |
| Fare la doccia/bagno | SI/NO          | SI/NO            |
| Telefonare           | SI/NO          | SI/NO            |
| Fare acquisti        | SI/NO          | SI/NO            |
| Cucinare             | SI/NO          | SI/NO            |
| Pulizie di casa      | SI/NO          | SI/NO            |
| Fare il bucato       | SI/NO          | SI/NO            |
| Guidare              | SI/NO          | SI/NO            |
| Assumere farmaci     | SI/NO          | SI/NO            |
| Finanza              | SI/NO          | SI/NO            |

**25. Dall'inizio dell'epidemia di coronavirus, il suo caregiver è venuto a trovarla?**

- Non sono mai venuti                       Meno spesso  
 Come al solito                               Più spesso  
 N/A Vivo con loro

**26. Dall'inizio dell'epidemia di coronavirus, come si è tenuto in contatto con parenti e amici?**

- Telefonate                                       Video chiamate                       Messaggi  
 Sono andato a trovarli                       Sono venuti a trovarmi

**26.a. Dall'inizio dell'epidemia di coronavirus, ci sono stati dei cambiamenti nella frequenza delle comunicazioni con parenti e amici?**

- Aumentata                                       Ridotta                                       Non è cambiata

**27. Dall'inizio dell'epidemia di coronavirus, ha cambiato il suo modo di fare la spesa?**

- Cerco di comprare soltanto ciò che mi serve realmente  
 Acquisto qualsiasi cosa, senza chiedermi se sia necessaria  
 Ho comprato due o più confezioni dello stesso prodotto  
 Ho fatto meno acquisti

**28. Dall'inizio dell'epidemia di coronavirus, sono cambiate le sue abitudini alimentari?**

- Mangio molto più salutare di prima  
 Mangio meno sano di prima  
 Faccio numerosi spuntini durante il giorno  
 Mangio meno di prima

**29. Se fumatore, durante il periodo di isolamento ha fumato di più?**

- Sì                                                   No

**29.a. Se sì, quante sigarette/giorno rispetto a prima: \_\_\_\_\_**

**30. Pensa che il suo peso sia cambiato dall'inizio dell'epidemia?**

- Il peso è lo stesso                               Ho perso peso                               Il peso è aumentato

### 31. Durante l'isolamento, quale tipo di attività fisica ha condotto?

- Passeggiare
- Esercizi a casa
- Nessuno
- Andare in bicicletta
- Camminare in casa
- Altro \_\_\_\_\_

### 31.a. Durante l'epidemia di coronavirus, con quale frequenza ha condotto gli esercizi?

\_\_\_\_\_ minuti al giorno  
\_\_\_\_\_ volte a settimana

### Sezione 5. Gli effetti del COVID-19 sullo stato emotivo

Per favore indicare la risposta che meglio descrive come si sente in questo periodo, da quando è iniziata l'epidemia

|    |                                                                                             | Mai | Raramente | Qualche volta | Spesso | Sempre |
|----|---------------------------------------------------------------------------------------------|-----|-----------|---------------|--------|--------|
| 1  | Mi dispiace fare molte cose da solo                                                         |     |           |               |        |        |
| 2  | Mi manca la compagnia                                                                       |     |           |               |        |        |
| 3  | Mi ritrovo ad aspettare che qualcuno mi chiami o mi mandi un messaggio molto più di prima   |     |           |               |        |        |
| 4  | Certi giorni sono così noiosi da trascorrerli a letto                                       |     |           |               |        |        |
| 5  | Avrei voglia di abbracciare qualcuno                                                        |     |           |               |        |        |
| 6  | Le giornate sembrano non finire mai                                                         |     |           |               |        |        |
| 7  | Le persone sono intorno a me, ma non con me                                                 |     |           |               |        |        |
| 8  | Credo che se dovesse succedermi qualcosa non avrei nessuno a cui poter chiedere aiuto       |     |           |               |        |        |
| 9  | Vorrei che i miei familiari facessero molto di più per me                                   |     |           |               |        |        |
| 10 | Ho la sensazione che ci sia qualcuno a casa con me                                          |     |           |               |        |        |
| 11 | Sono irritabile                                                                             |     |           |               |        |        |
| 12 | Mi sento meno motivato                                                                      |     |           |               |        |        |
| 13 | Mi sento ansioso                                                                            |     |           |               |        |        |
| 14 | Mi sento triste                                                                             |     |           |               |        |        |
| 15 | Sono preoccupato che gli altri non rispettino le regole anti contagio e di isolamento       |     |           |               |        |        |
| 16 | Sono preoccupato di contrarre il coronavirus                                                |     |           |               |        |        |
| 17 | Sono preoccupato di subire provvedimenti se non rispetto le regole anti-contagio            |     |           |               |        |        |
| 18 | Sono preoccupato della mia situazione economica                                             |     |           |               |        |        |
| 19 | Ho difficoltà a dormire                                                                     |     |           |               |        |        |
| 20 | Mi concedo qualche extra in più (cibo, bevande alcoliche)                                   |     |           |               |        |        |
| 21 | Quando tutto finirà, temo di non riuscire a ritornare alla mia vita precedente con facilità |     |           |               |        |        |
| 22 | Sto cercando di vedere il lato positivo, ma non è per niente semplice                       |     |           |               |        |        |
| 23 | Non credo che potrò sopportare tutto questo per molto tempo                                 |     |           |               |        |        |

Grazie!



**8. Quali dispositivi ha a casa sua? Indicare tutte le risposte valide.**

- |                                                            |                                                      |
|------------------------------------------------------------|------------------------------------------------------|
| <input type="checkbox"/> Smartphone                        | <input type="checkbox"/> Televisione                 |
| <input type="checkbox"/> Telefono cellulare/telefono fisso | <input type="checkbox"/> Amazon devices (i.e. Alexa) |
| <input type="checkbox"/> PC/computer                       | <input type="checkbox"/> Tablet                      |

**8.a. Quali dispositivi sono a casa del *paziente*? Indicare tutte le risposte valide.**

- |                                                            |                                                      |
|------------------------------------------------------------|------------------------------------------------------|
| <input type="checkbox"/> Smartphone                        | <input type="checkbox"/> Televisione                 |
| <input type="checkbox"/> Telefono cellulare/telefono fisso | <input type="checkbox"/> Amazon devices (i.e. Alexa) |
| <input type="checkbox"/> PC/computer                       | <input type="checkbox"/> Tablet                      |

**8.b. Durante l'isolamento, quale modalità di comunicazione ha usato con il *paziente*? Indicare tutte le risposte valide.**

- Telefonata
- Videochiamata
- Messaggi
- Altro: \_\_\_\_\_

**Sezione 2. Dispositivi di protezione individuale**

Per favore risponda alle seguenti domande in riferimento al periodo di inizio dell'epidemia di coronavirus:

**9. Ha comprato una mascherina per sé e/o per il *paziente*?**

- Sì                       No

**9.a. Se no, perché?**

- Sono introvabili nella mia città
- Non penso di averne bisogno
- Sono molto costose
- Altro: \_\_\_\_\_

**10. Ha comprato dei guanti usa e getta per sé e/o per il *paziente*?**

- Sì                       No

**10.a. Se no, perché?**

- Sono introvabili nella mia città
- Preferisco lavarmi le mani
- Ho un gel disinfettante
- Altro: \_\_\_\_\_

**11. Si assicura molto più di prima che il *paziente* si sia lavato le mani?**

- Sì                       No                       Forse

**11.a. E' difficile far lavare le mani al *paziente*?**

- No
- Si dimentica spesso di farlo
- Si lava diverse volte le mani perché si dimentica di averlo già fatto
- Altro: \_\_\_\_\_

### Sezione 3. Conoscenza del COVID-19

|    |                                                                                                                           | Mai | Raramente | Qualche volta | Spesso | Sempre |
|----|---------------------------------------------------------------------------------------------------------------------------|-----|-----------|---------------|--------|--------|
| 12 | Cerco di tenermi aggiornato seguendo telegiornali, seguendo talk show, leggendo riviste, acquistando libri sull'argomento |     |           |               |        |        |
| 13 | Sono a conoscenza delle normative emanate dal Governo                                                                     |     |           |               |        |        |
| 14 | Conosco i rischi di contrarre il coronavirus                                                                              |     |           |               |        |        |
| 15 | Sono a conoscenza della situazione epidemiologica negli altri Paesi                                                       |     |           |               |        |        |
| 16 | Mi assicuro che il paziente sia al corrente della situazione                                                              |     |           |               |        |        |
| 17 | Cerco di rispettare le normative del Governo o le indicazioni sul distanziamento sociale e di rimanere a casa             |     |           |               |        |        |
| 18 | Mi assicuro che il paziente rispetti le misure di contenimento                                                            |     |           |               |        |        |

**NOTA PER IL RICERCATORE:** assicurarsi di ripetere le opzioni di risposta per ogni domanda.

### Sezione 4. L'impatto del coronavirus sulla vita quotidiana

**19. Pensa di aver contratto il coronavirus?**  Sì  No

**19.a. Se sì, ha contattato il suo medico di base?**  Sì  No

**19.b. Si è sottoposto al tampone?**  Sì  No

**19.c. Quali sintomi ha avuto?** \_\_\_\_\_

\_\_\_\_\_

**19.d. Altri dettagli:** \_\_\_\_\_

\_\_\_\_\_

**20. Qualcuno che conosce ha contratto il coronavirus?**

Sì  No

Se sì, chi? \_\_\_\_\_

**21. Qualcuno che conosce è morto di coronavirus?**

Sì  No Se sì, chi? \_\_\_\_\_

**22. A causa dell'epidemia di coronavirus, ha perso il suo lavoro?**

Sì  No

**22.a. Se no, la sua azienda ha avviato delle procedure di lavoro speciali?**

Lavoro agevole  Cassa integrazione  Altro: \_\_\_\_\_

**23. A causa del coronavirus, ha paura di uscire?**

Sì, molto più di prima  Non più del solito  
 Leggermente più di prima  Ho sempre paura di uscire

**23.a. A causa del coronavirus, ha paura di andare a trovare il *paziente*?**

- Sì                       No                       Non applicabile

**24. A causa della pandemia di coronavirus e delle misure restrittive, sono state cancellate alcune visite mediche di routine del *paziente*?**

- Sì                       No

Se sì, indicare quali: \_\_\_\_\_

**24.a E' preoccupato per questo?**

- Sì                       No

Se sì, perché? \_\_\_\_\_

**25. Il *paziente* assume una terapia farmacologica prescritta da un medico?**

- Sì                       No

**25.a. Se sì, assume un farmaco per la demenza?**

- Sì                       No

**25.b. È stato difficile reperire i farmaci?**

- Sì                       No

**25.c. Se sì, inserire tutte le alternative possibili:**

- Difficoltà ad ottenere ricette mediche/rinnovo piano terapeutico
- Le medicine non erano disponibili in farmacia
- Ho dovuto aspettare l'ordine in farmacia
- Ho evitato di andare in farmacia per evitare le occasioni di contagio
- Altro: \_\_\_\_\_

**25.d. Durante l'epidemia, come ha monitorato l'assunzione dei farmaci da parte del *paziente*?**

- Telefonata             Non ha bisogno di aiuto
- Messaggio             Glieli do io

**25.e. Dall'inizio dell'epidemia, il *paziente* si è dimenticato di assumere le medicine?**

- Mai                       Raramente             Qualche volta             Spesso                       Sempre

**25.f. Questo aspetto è peggiorato rispetto a prima della pandemia?**

- Sì                       No                       Forse

**25.g. Durante l'epidemia, le è stato possibile contattare il medico di base?**

- Sì, telefonicamente
- Sì, videochiamata
- Sì, messaggi
- Sì, sono andata presso lo studio
- No, non ho avuto problemi di salute
- No, ho preferito non disturbarli

**25.h. Ha avuto bisogno di cure specialistiche per sé o per il *paziente* per una condizione cronica?**

Sì  No

Se sì, specificare: \_\_\_\_\_

**25.i. Dall'inizio dell'isolamento, ha effettuato controlli medici presso l'ospedale / clinica / studio medico?**

Sì  No

Se sì, specificare: \_\_\_\_\_

**25.j. E' preoccupato per qualche aspetto della salute del *paziente*?**

Sì  No

Se sì, quale e perché \_\_\_\_\_

**26. Prima dell'epidemia, aiutava l'anziano nello svolgimento delle sue attività basiche e strumentali della vita quotidiana?**

Sì  No  N/A autonomo

**26.a. Se sì, indicare su quali attività il paziente ha ricevuto supporto da parte sua o di un altro caregiver prima e dopo l'isolamento:**

|                      | PRIMA LOCKDOWN | DURANTE LOCKDOWN |
|----------------------|----------------|------------------|
| Andare in bagno      | SI/NO          | SI/NO            |
| Alimentazione        | SI/NO          | SI/NO            |
| Vestirsi             | SI/NO          | SI/NO            |
| Cura personale       | SI/NO          | SI/NO            |
| Camminare            | SI/NO          | SI/NO            |
| Fare la doccia/bagno | SI/NO          | SI/NO            |
| Telefono             | SI/NO          | SI/NO            |
| Fare acquisti        | SI/NO          | SI/NO            |
| Cucinare             | SI/NO          | SI/NO            |
| Pulizie di casa      | SI/NO          | SI/NO            |
| Fare il bucato       | SI/NO          | SI/NO            |
| Guidare              | SI/NO          | SI/NO            |
| Assumere farmaci     | SI/NO          | SI/NO            |
| Finanza              | SI/NO          | SI/NO            |

**27. Durante l'epidemia di coronavirus, è andato a trovare l'anziano?**

Mai  Meno spesso  
 Come al solito  Più spesso  
 N/A Vivo con lui

**28. Durante l'epidemia di coronavirus, come si è tenuto in contatto con il *paziente*?**

Telefonate  Video chiamate  Messaggi  
 Sono andato a trovarlo  E' venuto a trovarmi

**28.a Durante l'epidemia di coronavirus, con quale frequenza ha comunicato con amici e parenti?**

Aumentata  Ridotta  Non è cambiata



**29. Dall'inizio dell'epidemia di coronavirus, ha cambiato il suo modo di fare la spesa?**

- Cerco di comprare soltanto ciò che mi serve realmente
- Acquisto qualsiasi cosa senza chiedermi se sia necessaria
- Ho comprato due o più confezioni dello stesso prodotto
- Ho fatto meno acquisti di prima

**30. Dall'inizio dell'epidemia di coronavirus, sono cambiate le sue abitudini alimentari?**

- Mangio molto più salutare di prima
- Mangio meno sano di prima
- Faccio numerosi spuntini durante il giorno
- Mangio meno di prima

**31. Se fumatore, durante il periodo di isolamento ha fumato di più rispetto a prima della pandemia?**

- Sì
- No

**31.a** Se sì, quante sigarette/giorno rispetto a prima: \_\_\_\_\_

**32. Pensa che il suo peso sia cambiato dall'inizio dell'epidemia?**

- Il peso è lo stesso
- Ho perso peso
- Il peso è aumentato

**33. Durante l'isolamento, quale tipo di attività fisica ha condotto?**

- Passeggiare
- Esercizi a casa
- Nessuno
- Andare in bicicletta
- Camminare in casa
- Altro \_\_\_\_\_

**33.a. Durante l'epidemia da coronavirus, con quale frequenza ha condotto gli esercizi?**

\_\_\_\_\_ minuti al giorno  
\_\_\_\_\_ volte a settimana

## Sezione 5. Gli effetti del COVID-19 sullo stato emotivo

Per favore indicare la risposta che meglio descrive come si sente in questo periodo, da quando è iniziata l'epidemia

|    |                                                                                                                     | Mai | Raramente | Qualche volta | Spesso | Sempre |
|----|---------------------------------------------------------------------------------------------------------------------|-----|-----------|---------------|--------|--------|
| 1  | Il <b>paziente</b> mi chiede molto più aiuto di prima                                                               |     |           |               |        |        |
| 2  | Sono stanco di preoccuparmi che il <b>paziente</b> rispetti la quarantena                                           |     |           |               |        |        |
| 3  | Se dovesse succedergli qualcosa ( <b>al paziente</b> ), non saprei come aiutarlo                                    |     |           |               |        |        |
| 4  | Sono preoccupato che il <b>paziente</b> mi dica che va tutto bene, ma in realtà mi nasconda qualcosa                |     |           |               |        |        |
| 5  | Il <b>paziente</b> mi accusa di averlo lasciato solo                                                                |     |           |               |        |        |
| 6  | Il <b>paziente</b> non apprezza i miei sforzi nel prendermi cura di lui nonostante gli impedimenti della quarantena |     |           |               |        |        |
| 7  | Quando il <b>paziente</b> non risponde subito al telefono, penso gli sia successo qualcosa                          |     |           |               |        |        |
| 8  | Per certi versi, da quando sono iniziate le misure restrittive il nostro rapporto è migliorato                      |     |           |               |        |        |
| 9  | Penso che potrei fare di meglio per il <b>paziente</b> di cui mi prendo cura                                        |     |           |               |        |        |
| 10 | Quando finirà tutto, sono preoccupato che il <b>paziente</b> non riuscirà a ricominciare la sua vita così com'era   |     |           |               |        |        |
| 11 | Sono irritabile                                                                                                     |     |           |               |        |        |
| 12 | Sono stressato                                                                                                      |     |           |               |        |        |
| 13 | Mi sento ansioso                                                                                                    |     |           |               |        |        |
| 14 | Mi sento triste                                                                                                     |     |           |               |        |        |
| 15 | Sono preoccupato che gli altri non rispettino le regole anti contagio e di isolamento                               |     |           |               |        |        |
| 16 | Sono preoccupato di contrarre il coronavirus                                                                        |     |           |               |        |        |
| 17 | Sono preoccupato di subire provvedimenti se non rispetto le regole anti-contagio                                    |     |           |               |        |        |
| 18 | Sono preoccupato della mia situazione economica                                                                     |     |           |               |        |        |
| 19 | Ho difficoltà a dormire                                                                                             |     |           |               |        |        |
| 20 | Mi concedo qualche extra in più (cibo, bevande alcoliche)                                                           |     |           |               |        |        |
| 21 | Non credo che potrò sopportare tutto questo per molto tempo                                                         |     |           |               |        |        |
| 22 | Sto cercando di vedere il lato positivo, ma non è per niente semplice                                               |     |           |               |        |        |
| 23 | Vorrei che tutto questo non fosse vero                                                                              |     |           |               |        |        |

Grazie!
